# Supplementary material
Source: PubMed Central journal article supplement (PMC3801000)
Supplement: 1304837110_pnas.201304837SI.pdf [file 1304837110_pnas.201304837SI.pdf]

# Supporting Information

Patra et al. 10.1073/pnas.1304837110

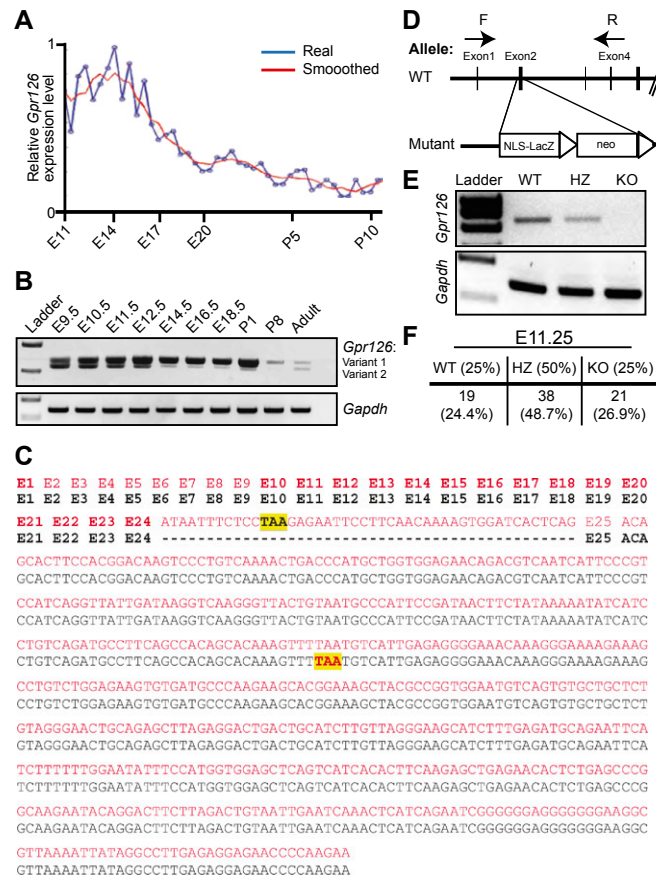

**Fig. S1.** Generation of R-G protein-coupled receptor 126 (*Gpr126*)<sup>-/-</sup> mice. (A) Microarray analysis (Affymetrix GeneChip Rat Expression Set 230) demonstrating the relative expression of *Gpr126* mRNA in rat heart tissue from E11 to P10.5 in 12-h intervals. (B) RT-PCR analysis showing the temporal *Gpr126* mRNA expression profile during mouse heart development. *Gapdh* was used as loading control. (C) Mouse *Gpr126* variant analysis. Variant 1 is in red, and variant 2 is in black. TAA, stop codons; E, Exon. (D) Scheme of the wild-type *Gpr126* locus and the mutant allele after homologous recombination. Arrows indicate primer binding sites to test the *Gpr126* mRNA transcript levels. F, forward primer; R, reverse primer. (E) RT-PCR analysis demonstrating the absence of *Gpr126* mRNA in *Gpr126*<sup>-/-</sup> mice heart. (F) Live offspring at E11.25 from *Gpr126*<sup>+/-</sup> matings. E, embryonic day; HZ, heterozygous; KO, knockout; P, postnatal day; WT, wild type.

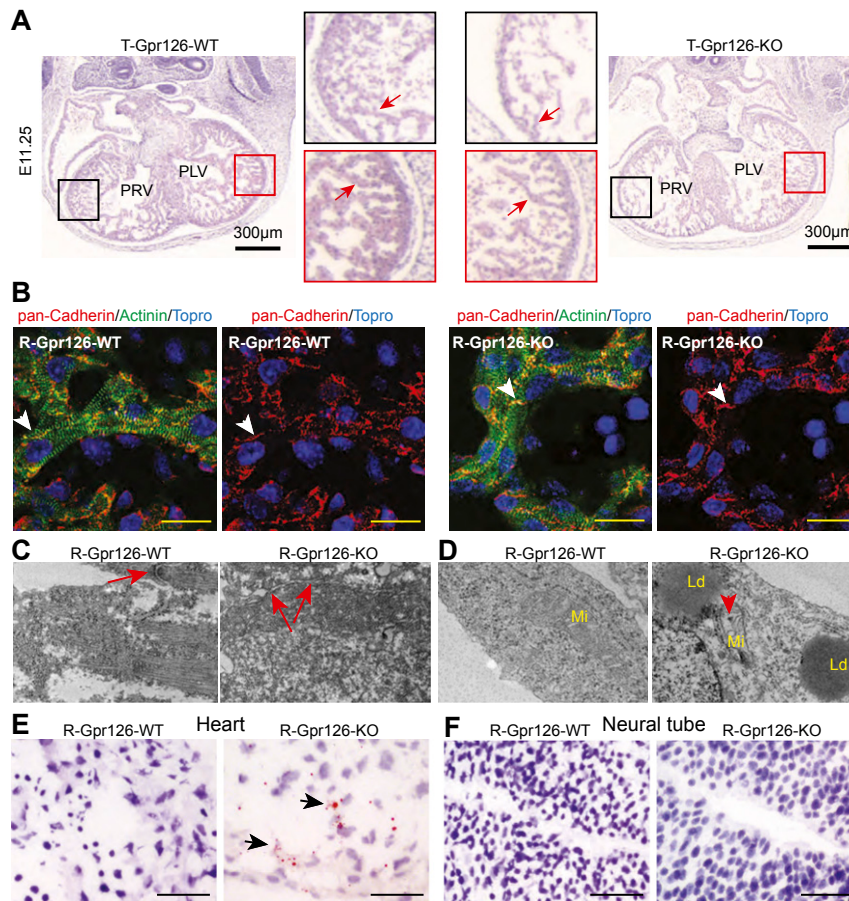

**Fig. S2.** Morphological and cellular analysis of *Gpr126*<sup>-/-</sup>. (A) T-*Gpr126*<sup>-/-</sup> mice used to study myelination exhibit defects in cardiac trabeculation. Hematoxylin and eosin staining of heart sections reveal hypotrabeculation and thinner trabeculae (arrows) in *Gpr126*<sup>-/-</sup> hearts ( $n = 2$ ) at E11.25. PLV, primitive left ventricle; PRV, primitive right ventricle. (B–F) Analysis of R-*Gpr126*<sup>-/-</sup> mice. (B) Confocal images of 5- $\mu$ m thin heart tissue sections stained for pan-Cadherin (red), cardiomyocyte-specific  $\alpha$ -actinin (green), and DNA (Topro; blue). White arrowheads indicate the typical expression pattern of Cadherin proteins at cell–cell adherent junctions in WT and KO hearts. (Scale bar: 25  $\mu$ m.) (C and D) Transmission electron micrographs at E11.25 of the myocardium (C) and endocardium (D). (C) Cell–cell contact (arrows) appears normal in KO hearts. (D) Endocardial cells from KO mice contain frequently lipid droplets (Ld) and electron-dense precipitates (arrowhead) in their mitochondria (Mi). (E and F) Cryosections from E11.25 WT and KO tissues stained for lipid (red) and costained with hematoxylin (blue). Lipid droplets (arrows) are visible in *Gpr126*<sup>-/-</sup> hearts but are detected neither in WT hearts (E) nor in neural tissue from WT and in *gpr126*<sup>-/-</sup> mice (F). (Scale bar: 65  $\mu$ m.)

|       |                                                                                                                                                                                                                                                                              |            |     |
|-------|------------------------------------------------------------------------------------------------------------------------------------------------------------------------------------------------------------------------------------------------------------------------------|------------|-----|
|       | Signal Peptide                                                                                                                                                                                                                                                               | Cub Domain |     |
| vari1 | MISFISGRWWRWKFQNTLAVFLLLI <del>CL</del> STSV <del>A</del> QSCQSSTS <del>C</del> NVVLTDSQGSFTSPCY <del>PND</del>                                                                                                                                                              |            | 60  |
| Vari2 | MISFISGRWWRWKFQNTLAVFLLLI <del>CL</del> ST <del>S</del> -----                                                                                                                                                                                                                |            | 30  |
| Vari3 | MISFISGRWWRWKFQNTLAVFLLLI <del>CL</del> ST <del>S</del> -----                                                                                                                                                                                                                |            | 30  |
| Vari4 | MISFISGRWWRWKFQNTLAVFLLLI <del>CL</del> STSV <del>A</del> QSCQSSTS <del>C</del> NVVLTDSQGSFTSPCY <del>PND</del>                                                                                                                                                              |            | 60  |
|       |                                                                                                                                                                                                                                                                              |            |     |
| vari1 | YPPSQSCNWTIQAPAGFIVQITFLDFELEE <del>A</del> QGCIYD <del>R</del> VVVV <del>T</del> GTSDA <del>R</del> FCGLTANGL <del>T</del> L                                                                                                                                                |            | 120 |
| Vari2 | -----                                                                                                                                                                                                                                                                        |            |     |
| Vari3 | -----                                                                                                                                                                                                                                                                        |            |     |
| Vari4 | YPPSQSCNWTIQAPAGFIVQITFLDFELEE <del>A</del> QGCIYD <del>R</del> VVVV <del>T</del> GTSDA <del>R</del> FCGLTANGL <del>T</del> L                                                                                                                                                |            | 120 |
|       |                                                                                                                                                                                                                                                                              |            |     |
|       | PTX Domain                                                                                                                                                                                                                                                                   |            |     |
| vari1 | NSTGNVMEVFFNSDFSVQ <del>R</del> GFHISY <del>K</del> QVAVTL <del>R</del> NQ <del>K</del> VTMP <del>R</del> SS <del>T</del> IL <del>R</del> VSNSISIPV <del>L</del> T                                                                                                           |            | 180 |
| Vari2 | -----VAVTL <del>R</del> NQ <del>K</del> VTMP <del>R</del> SS <del>T</del> IL <del>R</del> VSNSISIPV <del>L</del> T                                                                                                                                                           |            | 62  |
| Vari3 | -----VAVTL <del>R</del> NQ <del>K</del> VTMP <del>R</del> SS <del>T</del> IL <del>R</del> VSNSISIPV <del>L</del> T                                                                                                                                                           |            | 62  |
| Vari4 | NSTGNVMEVFFNSDFSVQ <del>R</del> GFHISY <del>K</del> QVAVTL <del>R</del> NQ <del>K</del> VTMP <del>R</del> SS <del>T</del> IL <del>R</del> VSNSISIPV <del>L</del> T                                                                                                           |            | 180 |
|       |                                                                                                                                                                                                                                                                              |            |     |
| vari1 | AFTVCFEIA <del>F</del> TAQ <del>F</del> ATETIFTLSDAAGT <del>S</del> ILAF <del>E</del> RTSNGMELFIGASYC <del>S</del> V <del>D</del> NLLTSS <del>D</del> I                                                                                                                      |            | 240 |
| Vari2 | AFTVCFEIA <del>F</del> TAQ <del>F</del> A <del>-</del> TIFTLSDAAGT <del>S</del> ILAF <del>E</del> RTSNGMELFIGASYC <del>S</del> V <del>D</del> NLLTSS <del>D</del> I                                                                                                          |            | 120 |
| Vari3 | AFTVCFEIA <del>F</del> TAQ <del>F</del> ATETIFTLSDAAGT <del>S</del> ILAF <del>E</del> RTSNGMELFIGASYC <del>S</del> V <del>D</del> NLLTSS <del>D</del> I                                                                                                                      |            | 122 |
| Vari4 | AFTVCFEIA <del>F</del> TAQ <del>F</del> ATETIFTLSDAAGT <del>S</del> ILAF <del>E</del> RTSNGMELFIGASYC <del>S</del> V <del>D</del> NLLTSS <del>D</del> I                                                                                                                      |            | 240 |
|       |                                                                                                                                                                                                                                                                              |            |     |
| vari1 | TATM <del>R</del> PLCLTWT <del>R</del> SSGLIGVYFGGHYFSS <del>I</del> CSASQIYT <del>L</del> QSGGL <del>L</del> QIAG <del>R</del> GSSSV <del>S</del> VDD <del>Q</del>                                                                                                          |            | 300 |
| Vari2 | TATM <del>R</del> PLCLTWT <del>R</del> SSGLIGVYFGGHYFSS <del>I</del> CSASQIYT <del>L</del> QSGGL <del>L</del> QIAG <del>R</del> GSSSV <del>S</del> VDD <del>Q</del>                                                                                                          |            | 180 |
| Vari3 | TATM <del>R</del> PLCLTWT <del>R</del> SSGLIGVYFGGHYFSS <del>I</del> CSASQIYT <del>L</del> QSGGL <del>L</del> QIAG <del>R</del> GSSSV <del>S</del> VDD <del>Q</del>                                                                                                          |            | 182 |
| Vari4 | TATM <del>R</del> PLCLTWT <del>R</del> SSGLIGVYFGGHYFSS <del>I</del> CSASQIYT <del>L</del> QSGGL <del>L</del> QIAG <del>R</del> GSSSV <del>S</del> VDD <del>Q</del>                                                                                                          |            | 300 |
|       |                                                                                                                                                                                                                                                                              |            |     |
| vari1 | NLDGFIYN <del>F</del> LWDHAML <del>S</del> SELSALTCDTVGNV <del>V</del> VDW <del>H</del> SYWTIPGSSTQ <del>T</del> DSTL <del>S</del> CS <del>---</del>                                                                                                                         |            | 356 |
| Vari2 | NLDGFIYN <del>F</del> LWDHAML <del>S</del> SELSALTCDTVGNV <del>V</del> VDW <del>H</del> SYWTIPGSSTQ <del>T</del> DSTL <del>S</del> CS <del>---</del>                                                                                                                         |            | 236 |
| Vari3 | NLDGFIYN <del>F</del> LWDHAML <del>S</del> SELSALTCDTVGNV <del>V</del> VDW <del>H</del> SYWTIPGSSTQ <del>T</del> DSTL <del>S</del> CS <del>IC</del> CF <del>P</del> N                                                                                                        |            | 242 |
| Vari4 | NLDGFIYN <del>F</del> LWDHAML <del>S</del> SELSALTCDTVGNV <del>V</del> VDW <del>H</del> SYWTIPGSSTQ <del>T</del> DSTL <del>S</del> CS <del>IC</del> CF <del>P</del> N                                                                                                        |            | 360 |
|       |                                                                                                                                                                                                                                                                              |            |     |
| vari1 | -----TAIT <del>T</del> LSPGTAGCASGLGCPAT <del>L</del> TV <del>T</del> I-----                                                                                                                                                                                                 |            | 383 |
| Vari2 | -----TAIT <del>T</del> LSPGTAGCASGLGCP-----                                                                                                                                                                                                                                  |            | 256 |
| Vari3 | CIHLKASTSGTAIT <del>T</del> LSPGTAGCASGLGCPAT <del>L</del> TV <del>T</del> I-----                                                                                                                                                                                            |            | 279 |
| Vari4 | CIHLKASTSGTAIT <del>T</del> LSPGTAGCASGLGCPAL <del>T</del> TTTTISH <del>P</del> STF <del>S</del> MPL <del>T</del> TTALL <del>P</del> TTT <del>V</del> K                                                                                                                      |            | 420 |
|       |                                                                                                                                                                                                                                                                              |            |     |
| vari1 | -----TSIAT <del>T</del> NIIP <del>T</del> NA-----T <del>T</del> HEDIF <del>R</del> STL <del>V</del> V <del>T</del> DE                                                                                                                                                        |            | 413 |
| Vari2 | -----EDIF <del>R</del> STL <del>V</del> V <del>T</del> DE                                                                                                                                                                                                                    |            | 270 |
| Vari3 | -----TSIAT <del>T</del> NIIP <del>T</del> NA-----T <del>T</del> HEDIF <del>R</del> STL <del>V</del> V <del>T</del> DE                                                                                                                                                        |            | 309 |
| Vari4 | TTTSA <del>H</del> TE <del>P</del> TATSA <del>K</del> TTTTVP <del>T</del> TSNL <del>P</del> PIQ <del>P</del> AAATNS <del>P</del> LS <del>I</del> R <del>K</del> T <del>N</del> EDIF <del>R</del> STL <del>V</del> V <del>T</del> DE                                          |            | 480 |
|       |                                                                                                                                                                                                                                                                              |            |     |
| vari1 | QTP <del>P</del> DRDATAIISQ <del>W</del> LNQ <del>T</del> FQ <del>N</del> W <del>M</del> YRV <del>V</del> YVDGIS <del>L</del> QLIT <del>V</del> LSRIT <del>T</del> TRQ <del>T</del> YLALL <del>V</del> YK <del>N</del> TT <del>D</del>                                       |            | 473 |
| Vari2 | QTP <del>P</del> DRDATAIISQ <del>W</del> LNQ <del>T</del> FQ <del>N</del> W <del>M</del> YRV <del>V</del> YVDGI-----RIT <del>T</del> TRQ <del>T</del> YLALL <del>V</del> YK <del>N</del> TT <del>D</del>                                                                     |            | 321 |
| Vari3 | QTP <del>P</del> DRDATAIISQ <del>W</del> LNQ <del>T</del> FQ <del>N</del> W <del>M</del> YRV <del>V</del> YVDGIS <del>L</del> QLIT <del>V</del> LSRIT <del>T</del> TRQ <del>T</del> YLALL <del>V</del> YK <del>N</del> TT <del>D</del>                                       |            | 369 |
| Vari4 | QTP <del>P</del> DRDATAIISQ <del>W</del> LNQ <del>T</del> FQ <del>N</del> W <del>M</del> YRV <del>V</del> YVDGIS <del>L</del> QLIT <del>V</del> LSRIT <del>T</del> TRQ <del>T</del> YLALL <del>V</del> YK <del>N</del> TT <del>D</del>                                       |            | 540 |
|       |                                                                                                                                                                                                                                                                              |            |     |
|       | HormR Domain                                                                                                                                                                                                                                                                 |            |     |
| vari1 | VNLA <del>E</del> VEIE <del>S</del> M <del>L</del> RSAPAI <del>G</del> NGLT <del>L</del> DSV <del>T</del> VN <del>L</del> MENCQ <del>A</del> DEF <del>P</del> VHY <del>R</del> WPES <del>R</del> PTV <del>T</del> QYV <del>P</del> CF                                        |            | 533 |
| Vari2 | VNLA <del>E</del> VEIE <del>S</del> M <del>L</del> RSAPAI <del>G</del> NGLT <del>L</del> DSV <del>T</del> VN <del>L</del> MENCQ <del>A</del> DEF <del>P</del> VHY <del>R</del> WPES <del>R</del> PTV <del>T</del> QYV <del>P</del> CF                                        |            | 381 |
| Vari3 | VNLA <del>E</del> VEIE <del>S</del> M <del>L</del> RSAPAI <del>G</del> NGLT <del>L</del> DSV <del>T</del> VN <del>L</del> MENCQ <del>A</del> DEF <del>P</del> VHY <del>R</del> WPES <del>R</del> PTV <del>T</del> QYV <del>P</del> CF                                        |            | 429 |
| Vari4 | VNLA <del>E</del> VEIE <del>S</del> M <del>L</del> RSAPAI <del>G</del> NGLT <del>L</del> DSV <del>T</del> VN <del>L</del> MENCQ <del>A</del> DEF <del>P</del> VHY <del>R</del> WPES <del>R</del> PTV <del>T</del> QYV <del>P</del> CF                                        |            | 600 |
|       |                                                                                                                                                                                                                                                                              |            |     |
| vari1 | PY <del>K</del> DR <del>N</del> AS <del>R</del> TC <del>M</del> IN <del>R</del> DN <del>Y</del> TS <del>F</del> WAL <del>P</del> DR <del>G</del> NCTN <del>I</del> TS <del>I</del> TVS <del>Q</del> ENAM <del>D</del> VAV <del>Q</del> LADI <del>S</del> NNGL <del>S</del> K |            | 593 |
| Vari2 | PY <del>K</del> DR <del>N</del> AS <del>R</del> TC <del>M</del> IN <del>R</del> DN <del>Y</del> TS <del>F</del> WAL <del>P</del> DR <del>G</del> NCTN <del>I</del> TS <del>I</del> TVS <del>Q</del> ENAM <del>D</del> VAV <del>Q</del> LADI <del>S</del> NNGL <del>S</del> K |            | 441 |
| Vari3 | PY <del>K</del> DR <del>N</del> AS <del>R</del> TC <del>M</del> IN <del>R</del> DN <del>Y</del> TS <del>F</del> WAL <del>P</del> DR <del>G</del> NCTN <del>I</del> TS <del>I</del> TVS <del>Q</del> ENAM <del>D</del> VAV <del>Q</del> LADI <del>S</del> NNGL <del>S</del> K |            | 489 |
| Vari4 | PY <del>K</del> DR <del>N</del> AS <del>R</del> TC <del>M</del> IN <del>R</del> DN <del>Y</del> TS <del>F</del> WAL <del>P</del> DR <del>G</del> NCTN <del>I</del> TS <del>I</del> TVS <del>Q</del> ENAM <del>D</del> VAV <del>Q</del> LADI <del>S</del> NNGL <del>S</del> K |            | 660 |

Fig. S3. (Continued)

```

vari1 EELTQVVTKVMELVNI AKINATLASTVVTII SNVMVSSEDA QKDASE TALKAVDELVQKI 653
Vari2 EELTQVVTKVMELVNI AKINATLASTVVTII SNVMVSSEDA QKDAS--ALKAVDELVQKI 499
Vari3 EELTQVVTKVMELVNI AKINATLASTVVTII SNVMVSSEDA QKDASE TALKAVDELVQKI 549
Vari4 EELTQVVTKVMELVNI AKINATLASTVVTII SNVMVSSEDA QKDASE TALKAVDELVQKI 720

vari1 EFDGPSLTISSKNLVVGV SALDTTNFNGSTLSAFIATNTTDPQIDF DSEAHNALAVVTL P 713
Vari2 EFDGPSLTISSKNLVVGV SALDTTNFNGSTLSAFIATNTTDPQIDF DSEAHNALAVVTL P 559
Vari3 EFDGPSLTISSKNLVVGV SALDTTNFNGSTLSAFIATNTTDPQIDF DSEAHNALAVVTL P 609
Vari4 EFDGPSLTISSKNLVVGV SALDTTNFNGSTLSAFIATNTTDPQIDF DSEAHNALAVVTL P 780

vari1 P TLLQNLSLSQIEK VSRINFMFFGRTGLFQD HQNNGLT LNSYVVASSVGNFTIKNLQDPV 773
Vari2 P TLLQNLSLSQIEK VSRINFMFFGRTGLFQD HQNNGLT LNSYVVASSVGNFTIKNLQDPV 619
Vari3 P TLLQNLSLSQIEK VSRINFMFFGRTGLFQD HQNNGLT LNSYVVASSVGNFTIKNLQDPV 669
Vari4 P TLLQNLSLSQIEK VSRINFMFFGRTGLFQD HQNNGLT LNSYVVASSVGNFTIKNLQDPV 840

vari1 RIEIAHLEYQKDPNPQC VFWD FNLQNYSGGCNSDGC VGS DSNSN TVCLCNHLTHFGIL 833
Vari2 RIEIAHLEYQKDPNPQC VFWD FNLQNYSGGCNSDGC VGS DSNSN TVCLCNHLTHFGIL 679
Vari3 RIEIAHLEYQKDPNPQC VFWD FNLQNYSGGCNSDGC VGS DSNSN TVCLCNHLTHFGIL 729
Vari4 RIEIAHLEYQKDPNPQC VFWD FNLQNYSGGCNSDGC VGS DSNSN TVCLCNHLTHFGIL 900

vari1 MDVSA AELIDEKNNRVLTFIT YIGCGISAIFSAATLLTY IAFEKLR RDYPSKILMNLST 893
Vari2 MDVSA AELIDEKNNRVLTFIT YIGCGISAIFSAATLLTY IAFEKLR RDYPSKILMNLST 739
Vari3 MDVSA AELIDEKNNRVLTFIT YIGCGISAIFSAATLLTY IAFEKLR RDYPSKILMNLST 789
Vari4 MDVSA AELIDEKNNRVLTFIT YIGCGISAIFSAATLLTY IAFEKLR RDYPSKILMNLST 960

vari1 SLLFLNMVFLLDGWLASYEIKELCVT VAVFLHFFLLTSFTW MGLESIHMYIALVKVFNTY 953
Vari2 SLLFLNMVFLLDGWLASYEIKELCVT VAVFLHFFLLTSFTW MGLESIHMYIALVKVFNTY 799
Vari3 SLLFLNMVFLLDGWLASYEIKELCVT VAVFLHFFLLTSFTW MGLESIHMYIALVKVFNTY 849
Vari4 SLLFLNMVFLLDGWLASYEIKELCVT VAVFLHFFLLTSFTW MGLESIHMYIALVKVFNTY 1020

vari1 IRRYILKFCIVGWVPA AIVGIVLAVSKDSYGNYYGKGDGQGTSEFCWILNPVVFYVT 1013
Vari2 IRRYILKFCIVGWVPA AIVGIVLAVSKDSYGNYYGKGDGQGTSEFCWILNPVVFYVT 859
Vari3 IRRYILKFCIVGWVPA AIVGIVLAVSKDSYGNYYGKGDGQGTSEFCWILNPVVFYVT 909
Vari4 IRRYILKFCIVGWVPA AIVGIVLAVSKDSYGNYYGKGDGQGTSEFCWILNPVVFYVT 1080

vari1 CVAYFSIIFLMNVAMFIVVMIQICGRNGKRSNRTLRE DILRNLR SVVSLTFLLGMTWGF A 1073
Vari2 CVAYFSIIFLMNVAMFIVVMIQICGRNGKRSNRTLRE DILRNLR SVVSLTFLLGMTWGF A 919
Vari3 CVAYFSIIFLMNVAMFIVVMIQICGRNGKRSNRTLRE DILRNLR SVVSLTFLLGMTWGF A 969
Vari4 CVAYFSIIFLMNVAMFIVVMIQICGRNGKRSNRTLRE DILRNLR SVVSLTFLLGMTWGF A 1140

vari1 FFAWGPVSLAFMYLFTIFNSLQGLFIFV FHCALKENVQKQWRRYLCCGKLR LADNSDWSK 1133
Vari2 FFAWGPVSLAFMYLFTIFNSLQGLFIFV FHCALKENVQKQWRRYLCCGKLR LADNSDWSK 979
Vari3 FFAWGPVSLAFMYLFTIFNSLQGLFIFV FHCALKENVQKQWRRYLCCGKLR LADNSDWSK 1029
Vari4 FFAWGPVSLAFMYLFTIFNSLQGLFIFV FHCALKENVQKQWRRYLCCGKLR LADNSDWSK 1200

vari1 TATNNTKKVSSDNLGKSLSSSSFGSTTANWTSKAKATLNP FARHSNADSTLQ 1185
Vari2 TATNNTKKVSSDNLGKSLSSSSFGSTTANWTSKAKATLNP FARHSNADSTLQ 1031
Vari3 TATNNTKKVSSDNLGKSLSSSSFGSTTANWTSKAKATLNP FARHSNADSTLQ 1081
Vari4 TATNNTKKVSSDNLGKSLSSSSFGSTTANWTSKAKATLNP FARHSNADSTLQ 1252

```

Fig. 53. Multiple sequence analysis of four zebrafish *gpr126* splice variants. Sequence alignment had been done by CLUSTAL 2.1 multiple sequence alignment and domain analysis by Simple Modular Architecture Research Tool.







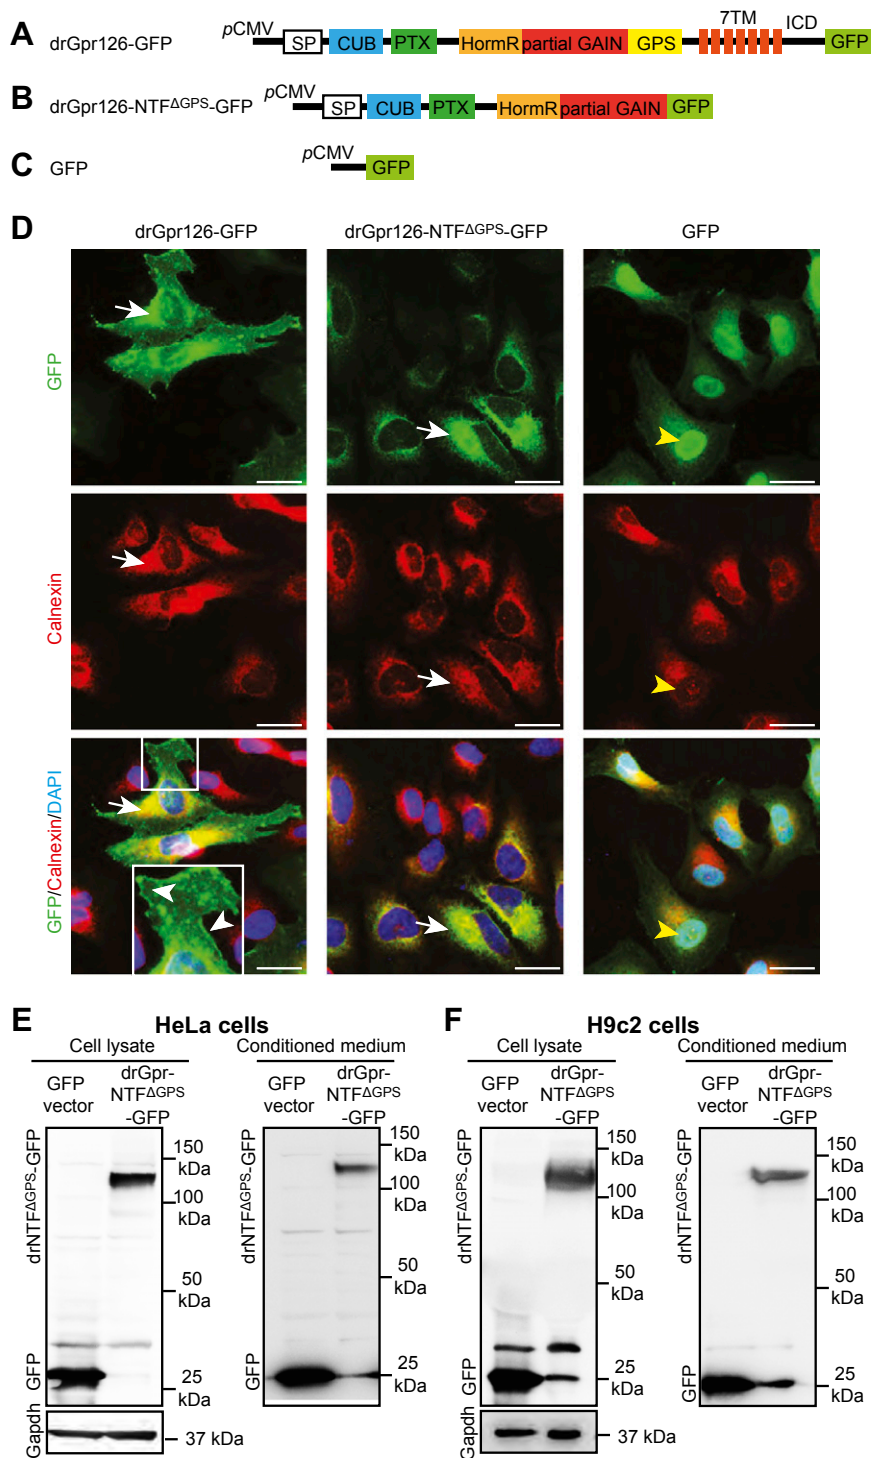

**Fig. S6.** The NTF part of the st49 mutant form of zebrafish Gpr126 is an independent, stable, secreted protein. (A and B) Schematic depiction of the C-terminal GFP-tagged drGpr126 (A) and drGpr126-NTF<sup>ΔGPS</sup> (B). ICD, intracellular domain. (C) GFP vector used as control. (D) Immunofluorescence analysis of HeLa cells stained for GFP (green) and calnexin (red) after transfection with constructs described in A–C. Nuclei were stained with DAPI (blue). drGpr126-GFP localized to the plasma membrane (white arrowheads) and colocalized with calnexin (arrows), an endoplasmic reticulum marker protein. drGpr126-NTF<sup>ΔGPS</sup>-GFP was not detected at the plasma membrane but colocalized with calnexin (arrows). GFP was predominantly expressed in the nucleus (yellow arrowheads). (E and F) Western blot analysis of cell lysates and conditioned medium from HeLa (E) and H9c2 cells (F) after transfection with C-terminal GFP-tagged drGpr126-NTF<sup>ΔGPS</sup> or GFP. Note that GFP-tagged NTF<sup>ΔGPS</sup> (predicted band size: 113 kDa) and GFP (predicted band size: 27 kDa) were detected in both lysate and conditioned medium. Gapdh was used as loading control for cell lysates.







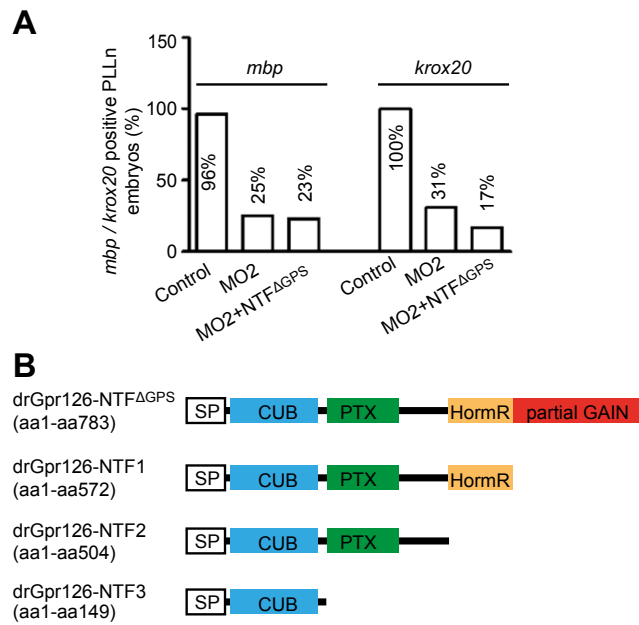

**Fig. 58.** Rescue experiments. (A) Quantitative analysis of control-, MO2-, or MO2+NTF $\Delta$ Gps mRNA-injected embryos at 75 hpf positive for *krox20/egr2* and *mbp* at the PLLn. (B) Schematic representation of zebrafish truncated Gpr126-NTF proteins encoded by RNAs used in rescue experiments.

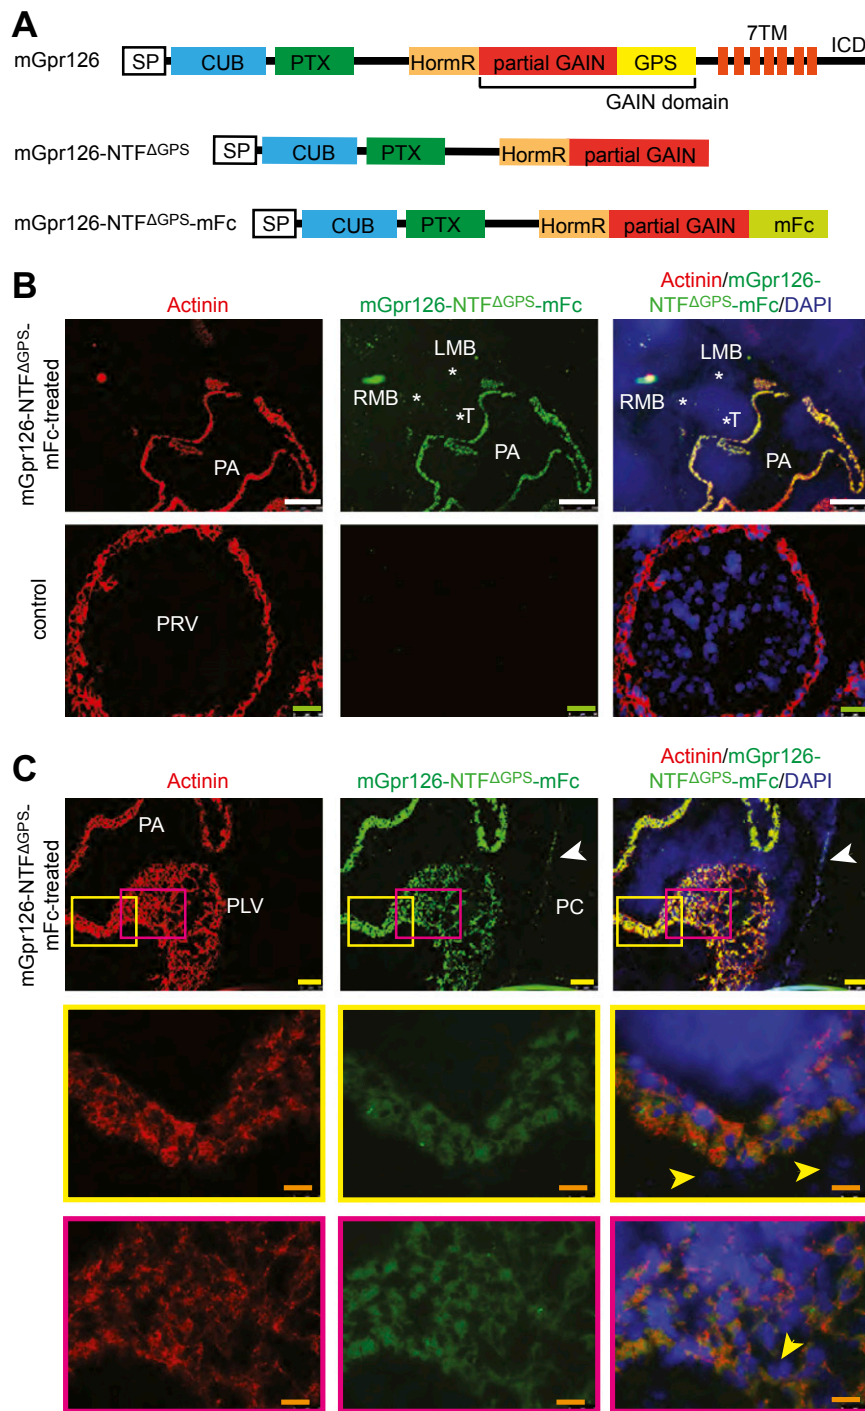

**Fig. S9.** Mouse Gpr126-NTF<sup>ΔGPS</sup> binds to cardiomyocytes and pericardial cells. (A) Schematic representation of mouse full-length Gpr126; Gpr126-NTF<sup>ΔGPS</sup>; and mGpr126-NTF<sup>ΔGPS</sup>-mFc, a fusion protein of Gpr126-NTF<sup>ΔGPS</sup> and the Fc fragment of murine IgG2b subclass (mFc) used for in situ binding studies. (B and C) Immunofluorescence analysis of 10- $\mu$ m thin E11.5 mouse embryo cryosections (at the level of the heart) incubated with mGpr126-NTF<sup>ΔGPS</sup>-mFc protein or concentrated conditioned medium of mock-transfected HEK-293 cells (control). Sections were stained for mGpr126-NTF<sup>ΔGPS</sup>-mFc (green), cardiomyocyte-specific  $\alpha$ -Actinin (red), and DNA (DAPI; blue). Note that mGpr126-NTF<sup>ΔGPS</sup>-mFc binds to cardiac tissue and the pericardium (white arrowhead in C) but not to other embryonic tissues. (C) mGpr126-NTF<sup>ΔGPS</sup>-mFc binds to Actinin-positive cardiomyocytes. In contrast, higher magnifications suggest that it does not bind in the heart to nonmyocytes (yellow arrowheads). LMB, left main bronchus; PA, primitive atrium; PC, pericardium; PLV, primitive left ventricle; RMB, right main bronchus; T, trachea. (Scale bars: white, 250  $\mu$ m; green, 50  $\mu$ m; yellow, 75  $\mu$ m; and orange, 25  $\mu$ m.)

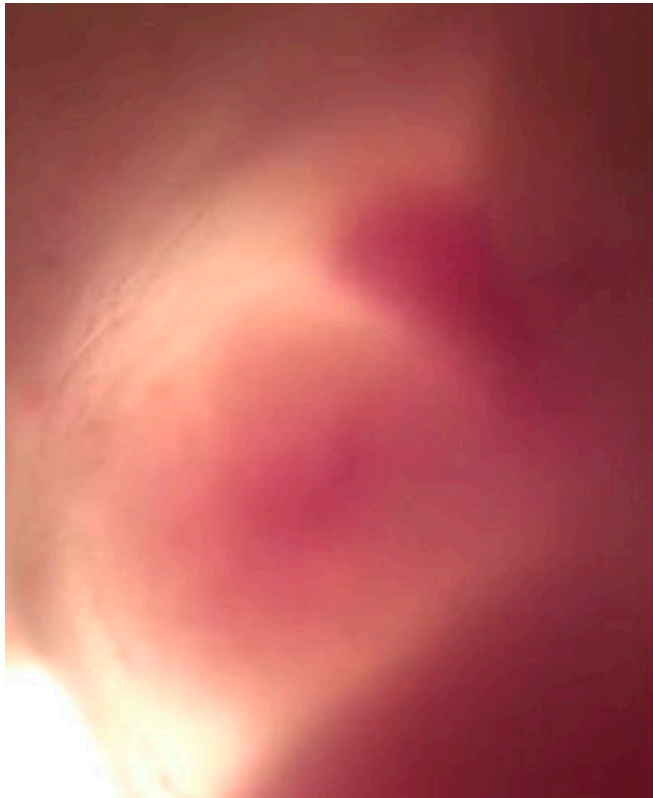

**Movie S1.** Representative movie of a beating heart from a E11.25 wild-type mouse embryo.

[Movie S1](#)

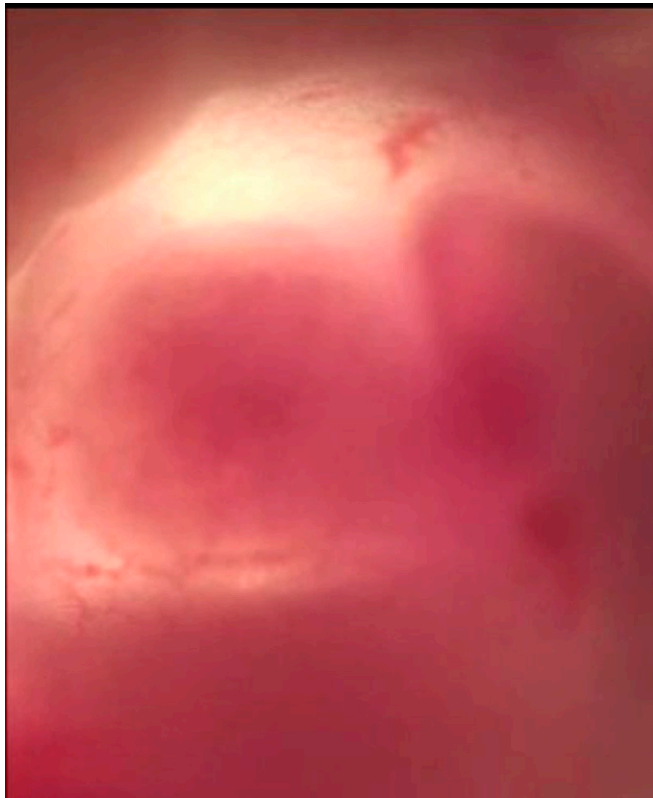

**Movie S2.** Representative movie of a beating heart from a E11.25 *Gpr126*<sup>-/-</sup> mouse embryo exhibiting bradycardia along with cardiac arrhythmia.

[Movie S2](#)
